# Supplementary material for: Discovery of New Hits as Antitrypanosomal Agents by In Silico and In Vitro Assays Using Neolignan-Inspired Natural Products from Nectandra leucantha
Source: MDPI journal article supplement (doi:10.3390/molecules26144116), 2021-07-06
Supplement: s1 [file s1]

## Supplementary Material

**Table S1.** Experimental and predicted pIC<sub>50</sub> for the test compounds

| Test set |                        | HQSAR                   |          | CoMFA                   |          | CoMSIA                  |          |
|----------|------------------------|-------------------------|----------|-------------------------|----------|-------------------------|----------|
| Compound | Exp. pIC <sub>50</sub> | Pred. pIC <sub>50</sub> | Residual | Pred. pIC <sub>50</sub> | Residual | Pred. pIC <sub>50</sub> | Residual |
| 7        | 5.02                   | 5.02                    | 0.00     | 5.10                    | 0.076    | 5.17                    | -0.145   |
| 8        | 4.52                   | 4.57                    | -0.05    | 4.56                    | 0.034    | 4.52                    | 0.003    |
| 19       | 4.91                   | 4.89                    | 0.02     | 4.90                    | -0.010   | 4.80                    | 0.112    |
| 23       | 4.52                   | 4.51                    | 0.01     | 4.53                    | 0.011    | 4.50                    | 0.026    |
| 29       | 4.82                   | 4.72                    | 0.10     | 4.71                    | -0.111   | 4.78                    | 0.040    |
| 32       | 4.56                   | 4.65                    | -0.09    | 4.63                    | 0.064    | 4.51                    | 0.051    |
| 34       | 5.24                   | 5.38                    | -0.15    | 5.24                    | 0.001    | 5.23                    | 0.005    |
| 37       | 4.98                   | 4.94                    | 0.04     | 4.99                    | 0.010    | 4.98                    | -0.005   |
| 42       | 4.59                   | 4.48                    | 0.11     | 4.54                    | -0.051   | 4.52                    | 0.068    |
| 43       | 5.11                   | 4.99                    | 0.12     | 5.01                    | -0.104   | 5.15                    | -0.033   |



[illegible]

|    |      |       |        |      |   |   |   |   |   |   |   |   |   |   |   |
|----|------|-------|--------|------|---|---|---|---|---|---|---|---|---|---|---|
| 35 | 4.96 | 27.69 | 310.16 | 5.31 | 1 | 1 | 1 | 1 | 1 | 1 | 1 | 1 | 1 | 1 | 1 |
| 36 | 4.78 | 47.92 | 328.17 | 5.68 | 1 | 1 | 1 | 1 | 1 | 1 | 1 | 1 | 0 | 1 | 1 |
| 37 | 4.98 | 47.92 | 328.17 | 5.68 | 1 | 1 | 1 | 1 | 1 | 1 | 1 | 1 | 1 | 1 | 1 |
| 38 | 4.93 | 36.92 | 342.18 | 5.61 | 1 | 1 | 1 | 1 | 1 | 1 | 1 | 1 | 1 | 1 | 1 |
| 39 | 5.26 | 46.15 | 450.24 | 7.15 | 1 | 1 | 1 | 1 | 1 | 1 | 1 | 1 | 1 | 1 | 1 |
| 40 | 5.07 | 57.15 | 434.21 | 6.92 | 1 | 1 | 1 | 1 | 1 | 1 | 1 | 1 | 1 | 1 | 1 |
| 41 | 4.87 | 46.15 | 448.22 | 6.85 | 1 | 1 | 1 | 1 | 1 | 1 | 1 | 1 | 1 | 1 | 1 |
| 42 | 4.59 | 36.92 | 300.14 | 4.66 | 1 | 1 | 1 | 1 | 1 | 1 | 1 | 1 | 1 | 1 | 1 |
| 43 | 5.11 | 38.69 | 296.14 | 5.37 | 1 | 1 | 1 | 1 | 1 | 1 | 1 | 1 | 1 | 1 | 1 |
| 44 | 4.94 | 36.92 | 416.20 | 6.55 | 1 | 1 | 1 | 1 | 1 | 1 | 1 | 1 | 0 | 1 | 1 |
| 45 | 4.65 | 38.69 | 296.14 | 5.37 | 1 | 1 | 1 | 1 | 1 | 1 | 1 | 1 | 1 | 1 | 1 |
| 46 | 4.96 | 36.92 | 416.20 | 6.55 | 1 | 1 | 1 | 1 | 1 | 1 | 1 | 1 | 0 | 1 | 1 |
| 47 | 4.52 | 36.92 | 300.14 | 4.66 | 1 | 1 | 1 | 1 | 1 | 1 | 1 | 1 | 1 | 1 | 1 |
| 48 | 4.52 | 46.15 | 406.18 | 5.90 | 1 | 1 | 1 | 1 | 1 | 1 | 1 | 1 | 1 | 1 | 1 |
| 49 | 4.52 | 36.92 | 326.15 | 5.14 | 1 | 1 | 1 | 1 | 1 | 1 | 1 | 1 | 1 | 1 | 1 |
| 50 | 4.52 | 46.15 | 406.18 | 5.90 | 1 | 1 | 1 | 1 | 1 | 1 | 1 | 1 | 1 | 1 | 1 |

---

**IC<sub>50</sub>**: Half-maximal inhibitory concentration; **pIC<sub>50</sub>**: -log IC<sub>50</sub>; **TopoPSA**: Topological polar surface area; **MW**: Molecular weight; **LogP**: Partition coefficient of a molecule between aqueous and lipophilic phases (in general, water and octanol, respectively); **PFP**: PubChem fingerprint.

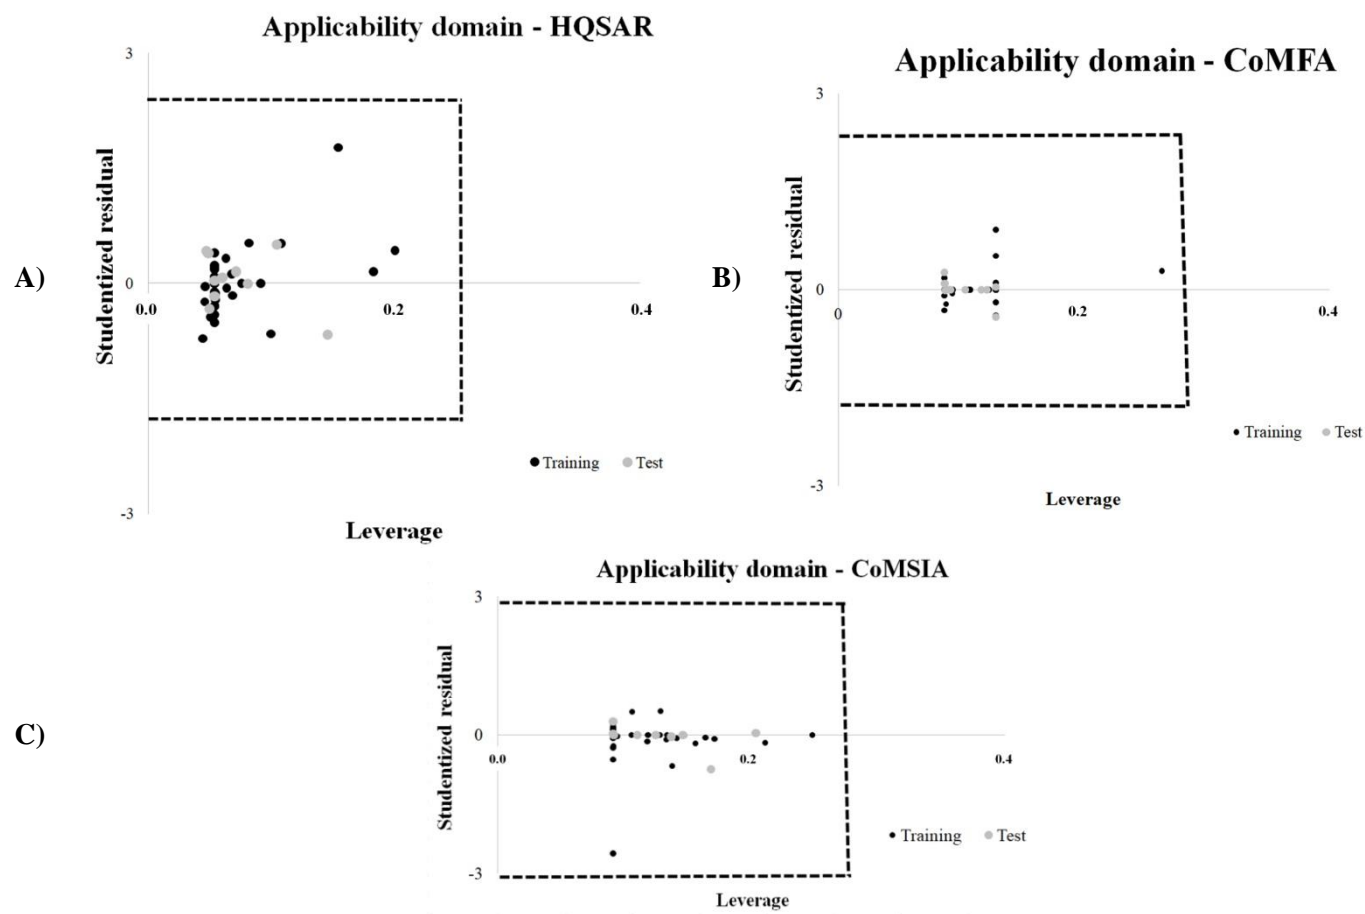

**Figure S1.** Plot of Leverage *versus* Studentized residuals for (A) HQSAR, (B) CoMFA and (C) CoMSIA (black dots represent the training set and grey dots represents the test compounds).

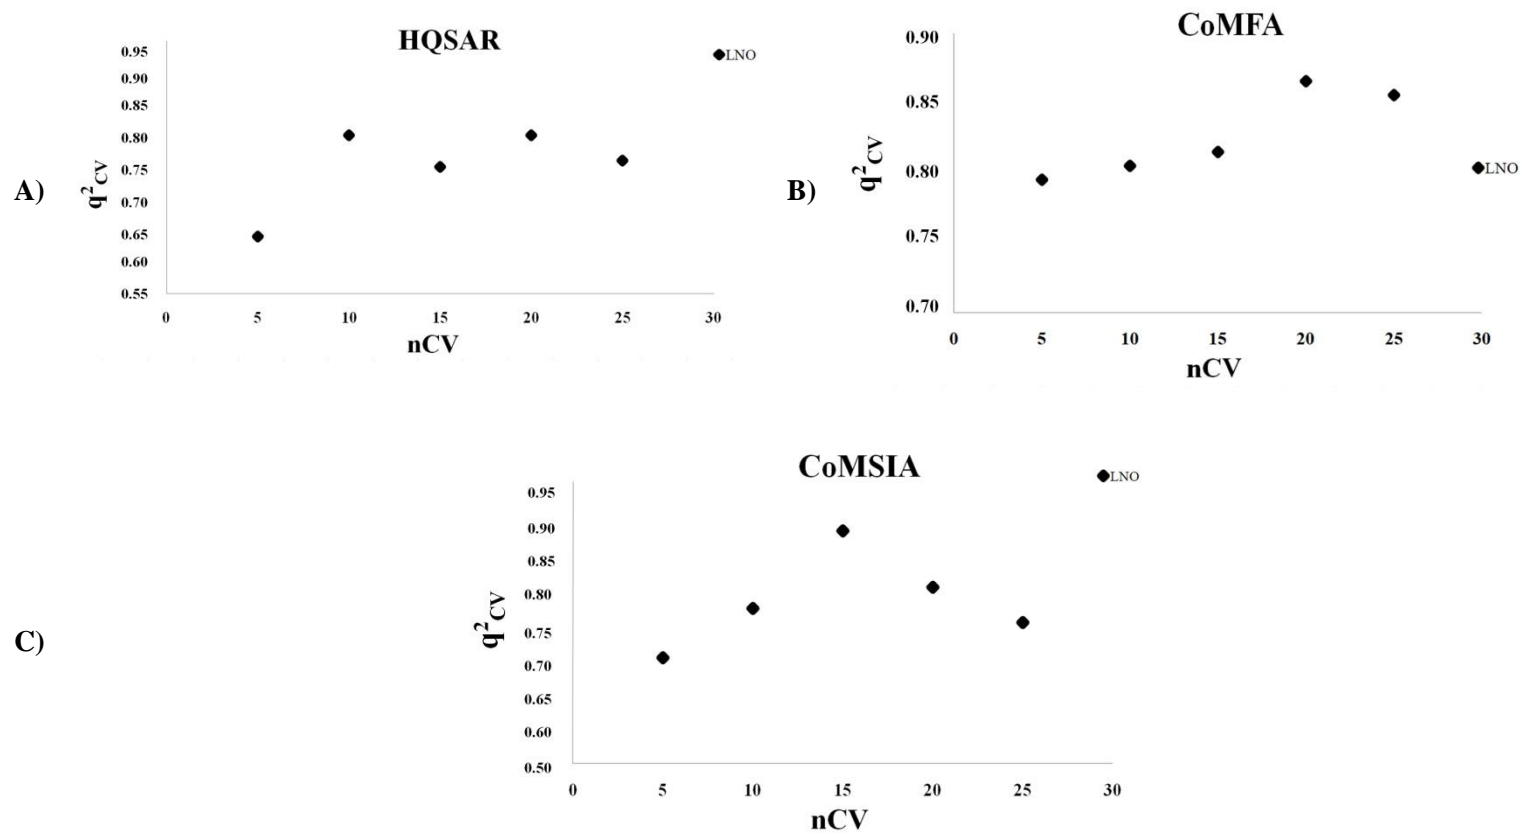

**Figure S2.** Results from the cross-validation (LNO) of the obtained models: (A) HQSAR, (B) CoMFA and (C) CoMSIA.

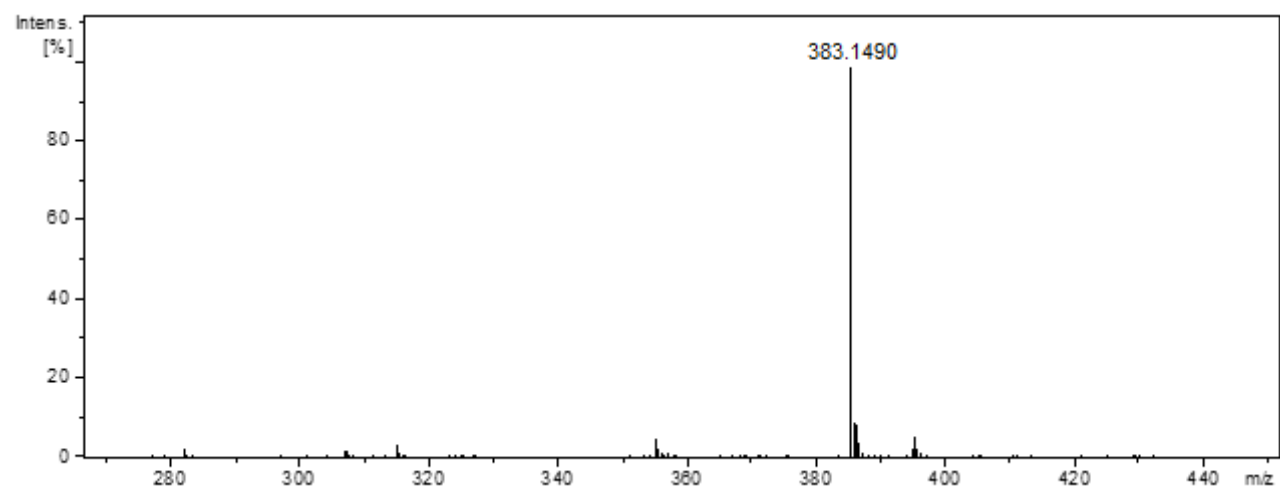

**Figure S3.** HRESIMS spectrum (positive mode) of compound **7**.

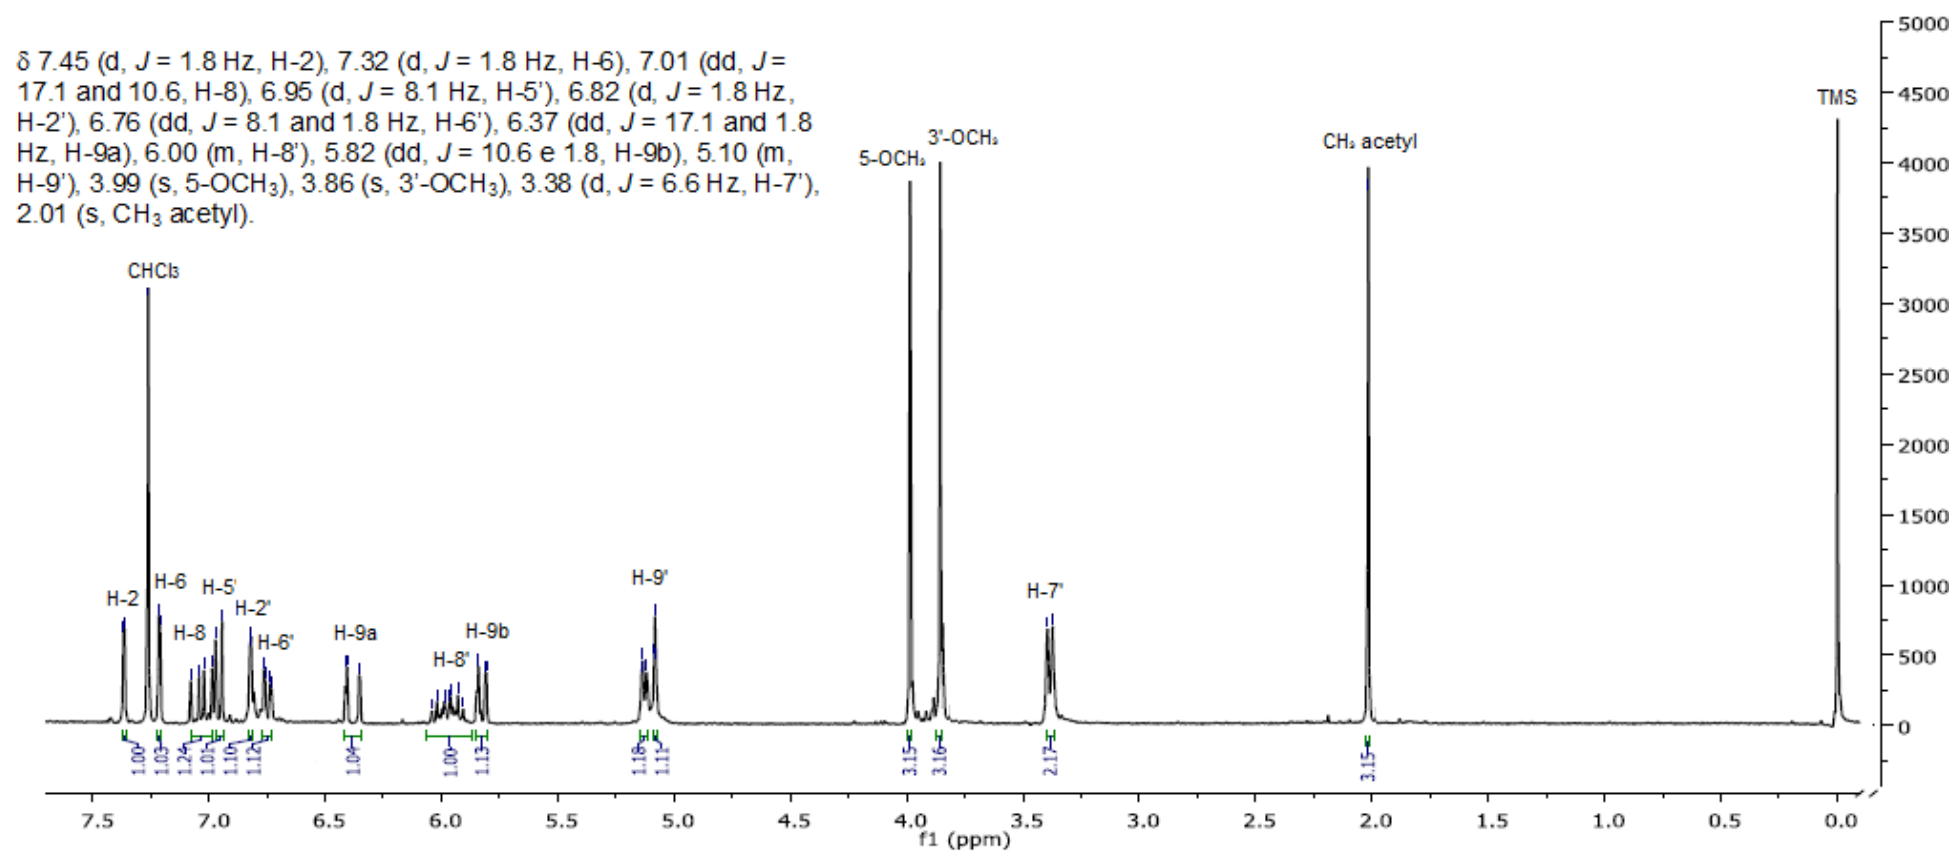

**Figure S4.**  $^1\text{H}$  NMR spectrum of compound **7** ( $\delta$ , 300 MHz,  $\text{CDCl}_3$ ).

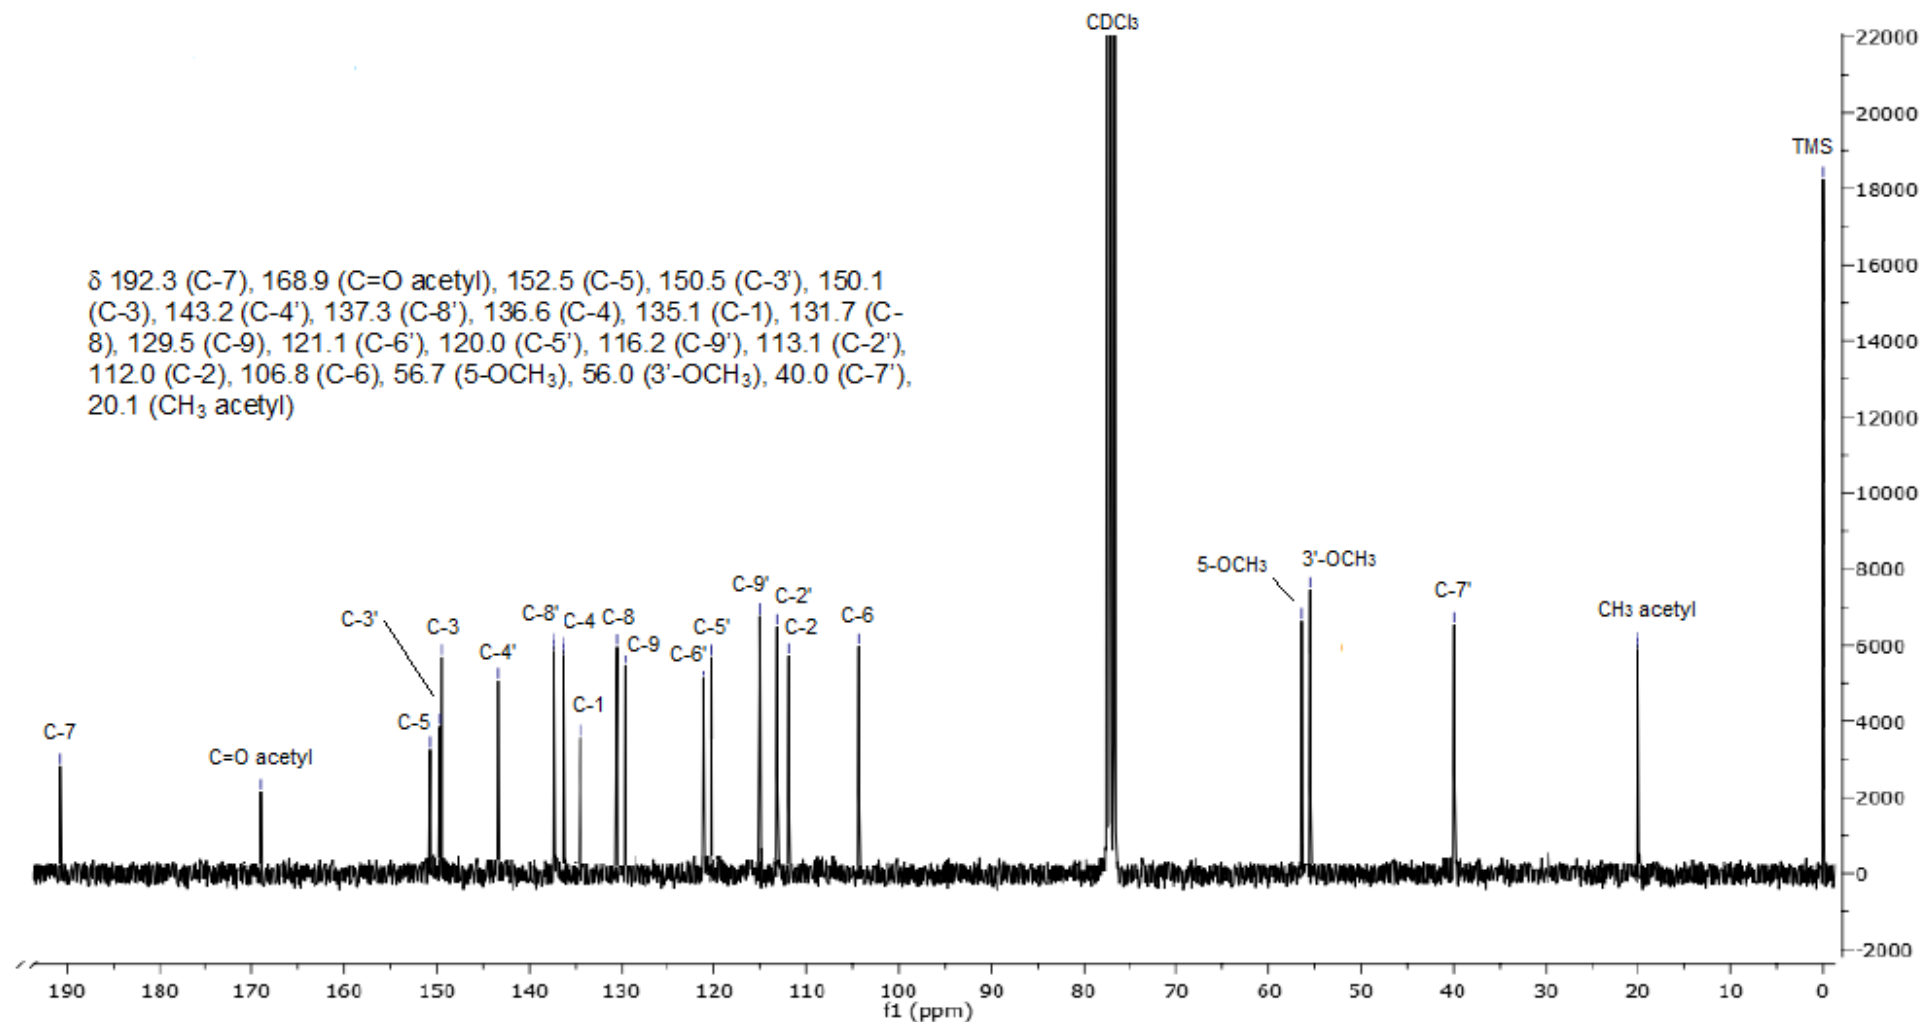

**Figure S5.** <sup>13</sup>C NMR spectrum of compound **7** ( $\delta$ , 75 MHz, CDCl<sub>3</sub>).

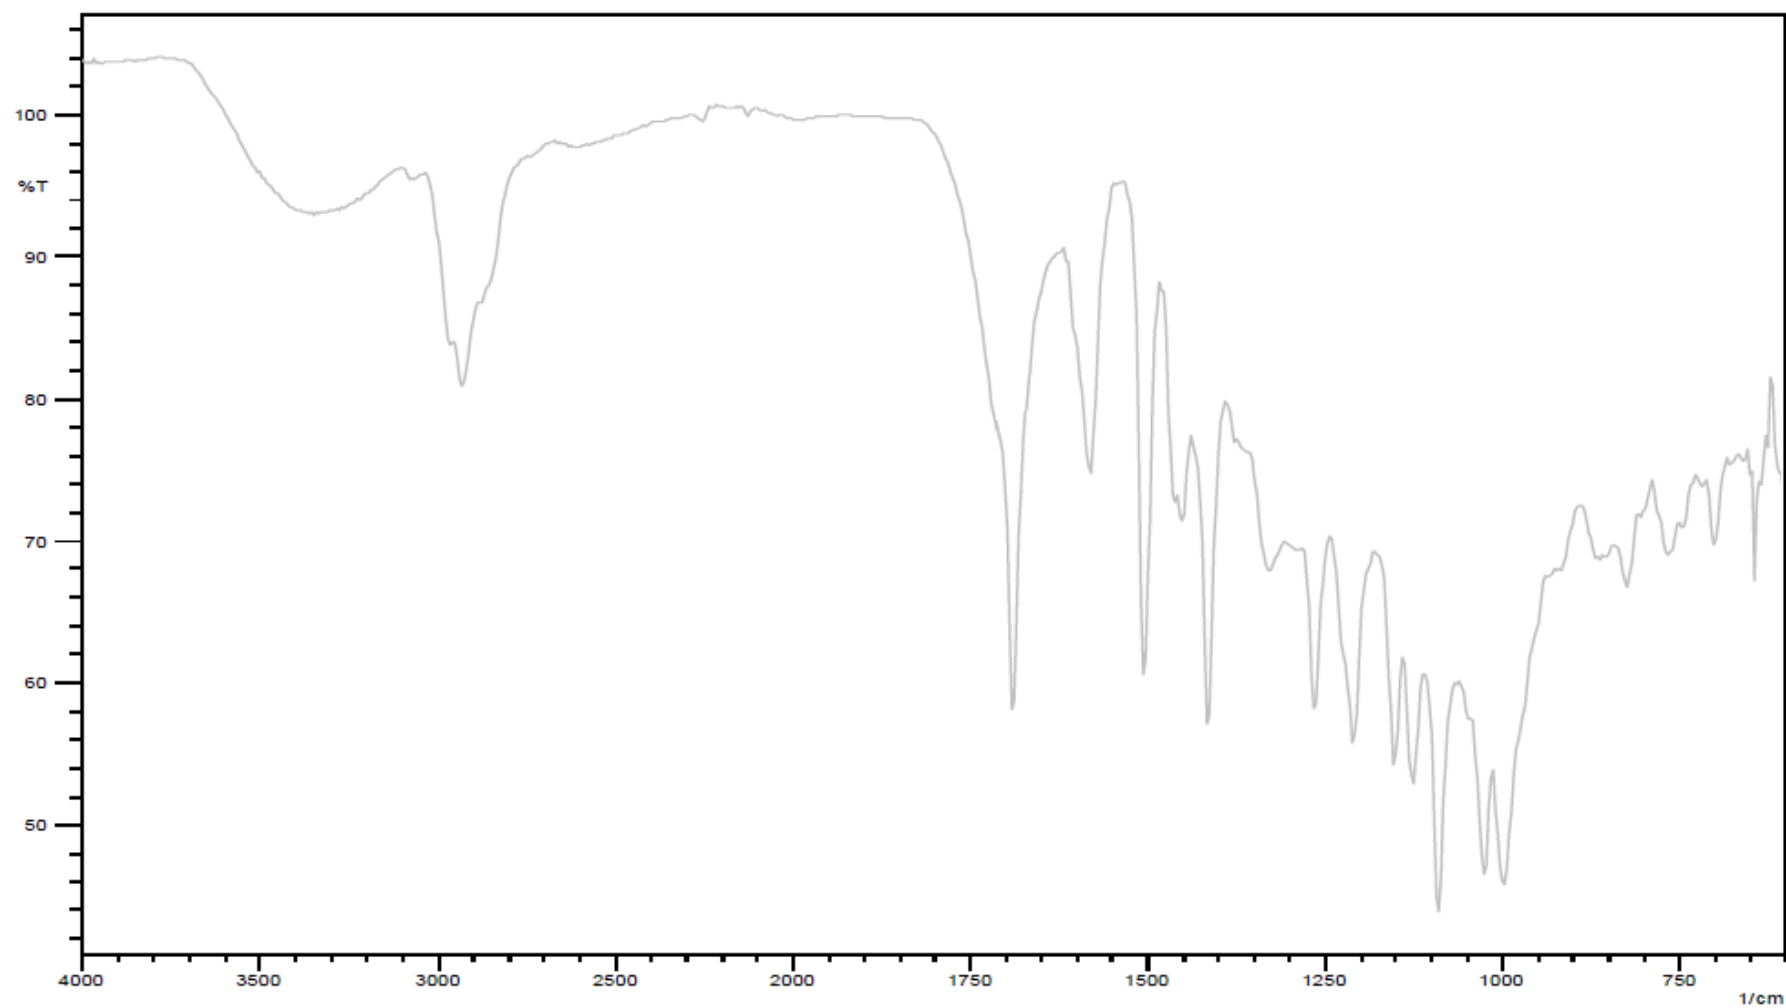

**Figure S6.** IR spectrum of compound **7**.
